# Supplementary material for: Chlamydia-induced curvature of the host-cell plasma membrane is required for infection
Source: PubMed Central journal article supplement — Proc Natl Acad Sci U S A. 2020 Jan 21;117(5):2634–44. doi: 10.1073/pnas.1911528117 (PMC7007526; doi:10.1073/pnas.1911528117), 2020-01-21
Supplement: pnas.1911528117.sapp.pdf [file pnas.1911528117.sapp.pdf]

Supplementary Information for

## **Chlamydia-induced curvature of the host-cell plasma membrane is required for infection**

Sebastian Hänsch<sup>a,b,1</sup>, Dominik Spona<sup>a,1</sup>, Gido Murra<sup>a</sup>, Karl Köhler<sup>c</sup>, Agathe Subtil<sup>d</sup>, Ana Rita Furtado<sup>d</sup>, Stephan F. Lichtenthaler<sup>e</sup>, Bastian Dislich<sup>e,f</sup>, Katja Mölleken<sup>a,2</sup>, Johannes H. Hegemann<sup>a,2,3</sup>

<sup>a</sup>Institute for Functional Microbial Genomics, Heinrich-Heine-Universität Düsseldorf, Düsseldorf, Germany

<sup>b</sup>Center of Advanced Imaging (CAI), Heinrich-Heine-Universität Düsseldorf, Düsseldorf, Germany

<sup>c</sup>Biologisch-Medizinisches Forschungszentrum (BMFZ), Genomics & Transcriptomics Laboratory (GTL), Heinrich-Heine-Universität Düsseldorf, Düsseldorf, Germany

<sup>d</sup>Unité de Biologie Cellulaire de l'Infection Microbienne, CNRS UMR3691, Institute Pasteur, Paris, France.

<sup>e</sup>German Center for Neurodegenerative Diseases (DZNE), within the Helmholtz Association, 81377 München, Germany

<sup>f</sup>Institut für Pathologie, Universität Bern, Bern, Switzerland

<sup>1</sup>contributed equally to this work

<sup>2</sup>These authors are joint senior authors on this work

<sup>3</sup>Correspondence should be directed to johannes.hegemann@hhu.de

### **This PDF file includes:**

Supplementary Methods  
Figures S1 to S6  
Tables S1  
Legends for Movies S1 to S15

### **Other supplementary materials for this manuscript include the following:**

Movies S1 to S15

## **Supplementary Methods**

### **Plasmid constructs, cloning procedures**

For heterologous secretion in *S. flexneri*, N-terminal sequences of *cpn0677* and *cpn0678* were integrated into pUC19cya using *HindIII* and *XbaI* sites. For protein expression, *cpn0677* and *cpn0678* were amplified from *C. pneumoniae* GiD genomic DNA and integrated into pFT25 to generate C-terminal 10His-Tag. Cpn678 $\Delta$ APH<sub>10His</sub> and Cpn678 $\Delta$ PRR1<sub>10His</sub> were amplified by PCR from WT constructs and integrated into pFT25. GST-SNX9\_pGEX5.1 was generated by cloning the SNX9 coding sequence into the *BamHI* and *NotI* sites of pGEX5X.1. GST-SNX9-SH3\_pGEX was kindly provided by NM Alto. The SH3 domain of SNX9 was amplified from a WT construct and fused to GST by integration into pKM36.

CPn0678-GFP WT and deletion variants were generated by cloning of *cpn0678* into pKM55. mCherry expression constructs were generated by recloning of *Grb2*, *c-Cbl* and *Cin85* (gift from MA McNiven) into pKM95 (C-terminal mCherry), and *SNX9* and of deletion variants into pAE66 (N-terminal mCherry). SNX9 shRNA plasmids used for generation of stable cell lines were obtained by integration of SNX9 target sequences shRNA\_1 (gagagtcagcatcatgtct) or shRNA\_2 (taagcacttgactggttat) into *MluI* and *Clal* sites of pLVTHM, respectively.

### **Transcript analysis**

For transcriptome analyses throughout the chlamydial infection cycle (0-96 h.p.i.), a home-made microarray spotted with 300- to 500-bp PCR products covering all *C. pneumoniae* ORFs was used. Chlamydial mRNA and gDNA was isolated at 2, 6, 12 and 24 h.p.i. using an MOI of 100, and at 24, 36, 48, 72 and 96 h.p.i. using an MOI of 5. mRNA was Cy5-labeled during reverse transcription, mixed with fragmented gDNA labeled with Cy3 and hybridized to the array. Signal detection and quantification were performed using ImaGen and GeneSpring software by comparing mRNA/gDNA signal intensities of three biological replicates per time point. Differentially regulated genes are those that showed at least a 2-fold increase or decrease in signal intensity.

### **Quantitative real-time PCR (qRT-PCR)**

HEp-2 cells were infected with *C. pneumoniae* (at MOI 100 and observed at 2-12 hpi, or at MOI 5 for analysis over the period 24-96 hpi) and nucleic acids were isolated at the indicated time points. cDNA was synthesized using pd(N)<sub>6</sub> random hexamers as primers on isolated RNA. To measure the ratio of mRNA per genome, previously isolated gDNA was used as a template in real-time PCRs following the manufacturer's instructions

(RealMasterMix SYBR ROX 2.5x, 5PRIME).  $\Delta$ CT values were determined using defined amounts of the cloned plasmid pSW1. This plasmid contains a fragment of the chlamydial *ompA* gene and was used as a standard for real-time PCRs in a PCR ABI Prism 7000 (Applied Biosystems). The ratios of specific mRNAs to genomic DNA were calculated from the measured  $\Delta$ CT values.

### **Co-immunoprecipitation**

For *in vivo* co-immunoprecipitation (Co-IP) of infected cells, HEp-2 cells were cultivated to 100% confluency in 6-well plates and infected with gradient-purified *C. pneumoniae* EBs (MOI 100) by centrifugation for 20 min (25°C at 2900 rpm). After centrifugation, cells were shifted to 37°C and grown under 6% CO<sub>2</sub> for 15 min. Infected cells were washed three times with HBSS and lysed with Phospho-Lysis buffer (1% NP40, 1% Triton X100, 20 mM Tris, 140 mM NaCl, 2 mM EDTA, 1 mM Na<sub>2</sub>VO<sub>4</sub>, Merck Protease Inhibitor Cocktail). The lysate was cleared by centrifugation for 10 min at 4°C at 10,000xg. The supernatant was mixed with Protein G MicroBeads (Miltenyi Biotech) that had been preincubated with 2  $\mu$ g antiSNX9 or anti-CPn0678 overnight at 4°C. Co-IP assays of co-transfected cells were performed using anti-GFP MicroBeads. Eluted proteins were resolved by SDS/PAGE and detected by immunoblot.

### **FRET-FLIM measurements and single-pixel FLIM analysis**

Measurements and analysis were performed after 18 h of expression in HEp-2 cells incubated in a prewarmed environment (37°C). Time-domain FLIM was performed on a confocal laser scanning microscope (Zeiss LSM 780) additionally equipped with a single-photon counting device with picosecond time resolution (PicoQuant Hydra Harp 400). eGFP fluorescence was excited at 485 nm using a linearly polarized diode laser (LDH-D-C-485) operated at a repetition rate of 32 MHz. Excitation power was monitored and adjusted to around 1  $\mu$ W at the objective (40 $\times$  water immersion, Zeiss C-PlanApo, NA 1.2). The emitted light was collected and fluorescence was then detected by Tau-SPADs (PicoQuant) within a narrow segment of the eGFP emission spectrum (band-pass filter: HC520/35 AHF). Images were taken with 12.6  $\mu$ s pixel time and a resolution of 0.17  $\mu$ m per pixel (zoom 5, 256  $\times$  256). A series of 80 frames was merged into one image and further analyzed. Additionally, fluorescence of mCherry was recorded by merging 10 frames excited with a DPSS-561 nm cw laser to verify acceptor presence. The instrument response function (IRF) of the setup was measured on each experimental day using a KI-quenched erithrosin B solution.

The fluorescence lifetime of eGFP was analyzed using the software tool SymPhoTime 64, version 2.3 (PicoQuant, Berlin, Germany). Due to the low excitation power used to prevent photobleaching during image acquisition, and the small pixel size adopted to increase spatial resolution, the number of photons per pixel was still low after merging of frames, ranging from 100 to a maximum of 1700 photons per pixel. An individual ROI was generated for every dataset to ensure that only pixels with a minimum of 200 photons contributed to the modeling of the average lifetime. The photon numbers within the ROI generate a histogram which is used for a single exponential fit to approximate the average eGFP lifetime with background contribution and correction for shifting of the IRF. The same model was applied to the CPn0678-GFP donor control and the CPn0678-GFP mCherry-SNX9 coexpression.

### **EGF uptake assay**

HEp-2 cells were transiently transfected with CPn0678-GFP or GFP alone for 15 h, washed twice with PBS and placed in serum-free medium for 5 h at 37°C and 6% CO<sub>2</sub>. EGF labeled with Alexa594 (100 ng/ml) was added for 15 min at 37°C. Cells were then washed twice with PBS and fixed with PFA for 10 min. EGF uptake was quantified by analyzing the presence of intracellular EGF vesicles in confocal images using ImageJ.

### **Pulldown assay**

Recombinant His- or GST-tagged proteins were expressed in *E. coli* BL21 and purified according to the manufacturer's protocols for *cOmplete* His-Tag purification resin (Roche) and Pierce Glutathione Agarose (Thermo Scientific). Aliquots (200 µg) of purified protein were incubated for 2 h at 4°C with either His-Tag purification resin or Glutathione Agarose, then 200 µg of the test protein was added and incubated for an additional 2 h at 4°C or the incubation sequence was reversed. The mixture was washed four times with PBS containing 50 mM imidazole (Merck) or 50 mM TRIS/HCL pH 8 (Merck). Eluted fractions were collected by adding 100 µl of 500 mM imidazole in PBS or 50 mM TRIS/HCl and 10 mM reduced glutathione in PBS, resolved by SDS/PAGE and detected by immunoblot.

### **Preabsorption of polyclonal antibodies**

Green fluorescent latex beads (diam. 1.036 µm, Polysciences) were coated with 40 µg/ml rCPn0677, rCPn0678 or BSA respectively. Purified antibodies were incubated with coated beads overnight at 4 C under constant agitation. The supernatant was collected after pelleting the beads by centrifugation (10 min at 17,000xg) and used for immunofluorescence staining.

### **Immunofluorescence staining**

Transfected and/or infected cells were fixed at the indicated time points with 3% paraformaldehyde in PBS (PFA) for 10 min, then washed three times with PBS, and permeabilized with either 100% methanol for 10 min or with 2% saponin (Merck) in PBS for 20 min. Depending on the permeabilization protocol, primary antibodies were diluted in PBS or in 0.5% saponin solution and incubated for 30 min at 37°C. Cells were washed three times with PBS with or without 0.5% saponin and incubated with secondary antibodies (anti-rabbit/mouse Alexa488/594) for 30 min at 37°C in PBS with or without 0.5% saponin. DAPI was used to visualize DNA.

### **Infection experiments**

HEp-2 cells either stably expressing, or transiently transfected with, the appropriate constructs were infected with *C. pneumoniae* EBs (MOI 1) by short centrifugation as described before, then shifted to 37°C for 2 h before the infection medium was replaced by fresh medium and the cells were incubated for 48 h. The number of inclusions formed was quantified by confocal imaging, using an antibody directed against the inclusion membrane protein Cpn0147 and anti-rabbit Alexa594, as described previously.

### **Internalization assay**

HEp-2 cells stably expressing the appropriate constructs were cultivated to 70% confluency in 24-well plates on glass coverslips ( $\varnothing$  1 cm<sup>2</sup>), then infected with purified *C. pneumoniae* EBs (MOI 5) by centrifugation for 20 min (25°C at 2900 rpm). After centrifugation, cells were shifted to 37°C and grown under 6% CO<sub>2</sub> for 2 h, washed three times with PBS and fixed with 3% paraformaldehyde in PBS (PFA) for 10 min. Internalization rates were determined by immunostaining with anti-Chlamydia and anti-rabbit Alexa488 and DAPI. Cells were imaged by confocal microscopy and internalization ratios were determined by counting external Alexa488-positive and all DAPI-positive bacteria.

### **Pearson Correlation Coefficient estimation for non-random colocalization**

“Pearson Correlation Coefficient” (PCC) of EGFR & Cpn0678, EGFR & SNX9 and SNX9 & CPn0678 signal pairs were estimated using the “Fiji-plugin JaCoP”. In each image Regions Of Interest (ROIs) of 100x100 pixel were chosen representing regions of strong chlamydial infection (with Cpn), which were compared to regions with cytoplasmic background signal (w/o Cpn). Image metadata were directly read by the plugin and completed manually (e.g. numerical aperture of objective or wavelength). PCC values were estimated using “JaCoP”. Simultaneously, the significance of the “Costes

*randomization*” was calculated by “JaCoP”, which compares PCCs of the original data with the PCCs of data with a randomly shuffled channel using 1000 iterations. To further stress the “*Costes randomization*” we applied an 8 pixel blocksize, representing the average signal size of the EB surrounded by EGFR/ SNX9/ CPn0678 for the scrambling procedure. “*Costes randomization*” significance was performed on each ROI at a blocksize of 8 pixel. In total 23 of 24 ROIs chosen for “with Cpn” and 20 of 24 ROIs for “w/o Cpn” regions passed the “*Costes randomization*” test using a minimum significance level of 95 % at a blocksize of 8 pixel. ROIs below the significance level were excluded from the PCC analysis.

## Supplementary Figures

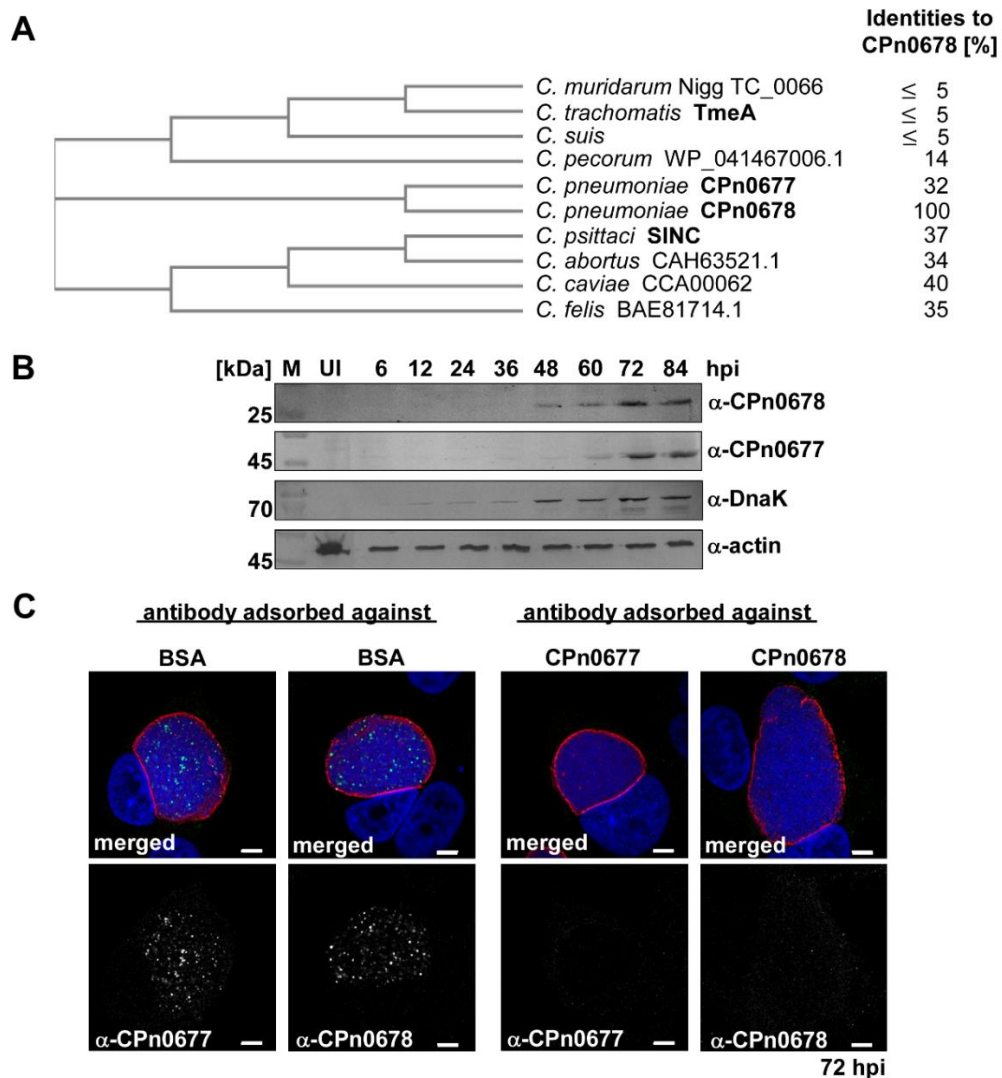

**Figure S1: CPn0677 and CPn0678 are expressed late during infection.**

(A) Phylogenetic analysis of CPn0678 homologs and syntenic proteins in the indicated species was performed using EMBL-EBI multiple sequence alignment and simple phylogeny tools. (B) Infected cells (MOI 5) were harvested at the indicated time points, and equal amounts of protein were fractionated by SDS/PAGE and probed with specific antibodies against CPn0677, CPn0678, DnaK and actin. (C) Confocal images of HEP-2 cells infected for 72 h, fixed with PFA, permeabilized with methanol and stained with antibodies against CPn0677 or CPn0678 which had been preabsorbed against either BSA (left panel) or recombinant CPn0677 or CPn0678 (right panel). Anti-CPn0677 and anti-CPn0678 antibodies were visualized with anti-rabbit Alexa488, and the inclusion membrane with anti-IncA antibody and anti-mouse Alexa 594. Host and bacterial DNAs were labeled with DAPI. Bar 5  $\mu$ m.

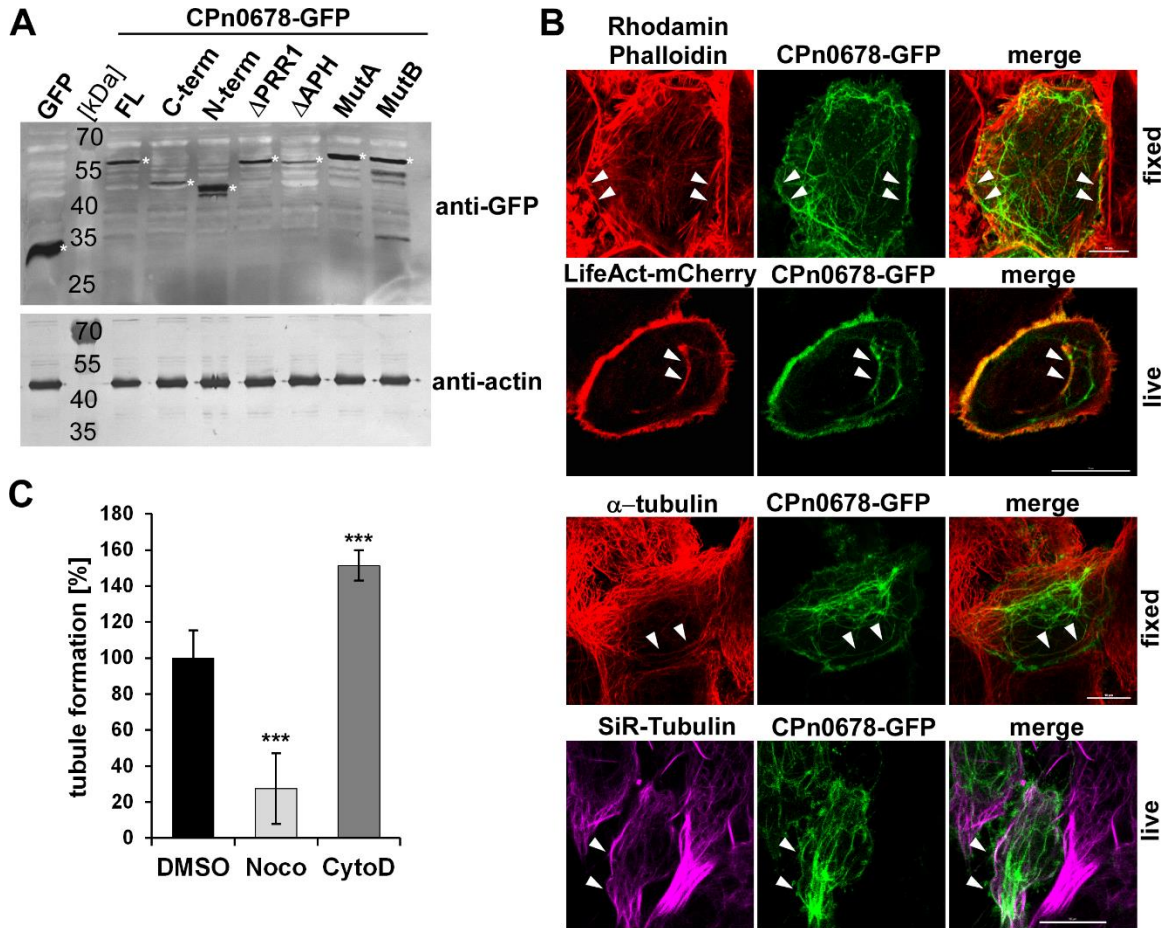

**Figure S2: CPn0678-generated membrane tubules associate with actin filaments and microtubules.**

(A) HEp-2 cells were transiently transfected with CPn0678-GFP or variants thereof for 24 h, lysed, fractionated by SDS/PAGE and probed with specific antibodies against GFP and actin. Expected bands are marked by white asterisks. (B) Confocal images of HEp-2 cells transfected for 15 h with CPn0678-GFP fixed and stained either with rhodamine phalloidin for actin, or with an anti- $\alpha$ -tubulin antibody and anti-mouse Alexa594, or live images of CPn0678-GFP-expressing cells cotransfected with LifeAct-mCherry or treated with SiR-Tubulin. White arrows mark sites of colocalization. Bar 10  $\mu$ m. (C) Quantification of tubule formation in cells transfected for 15 h with CPn0678-GFP, and treated for 30 min at 37°C with DMSO Cytochalasin D (CytoD) or Nocodazole (Noco). On average, 80 cells were analyzed. Data are represented as mean  $\pm$  SD (n=3). *P* value: \*\*\*  $\leq$  0.001.



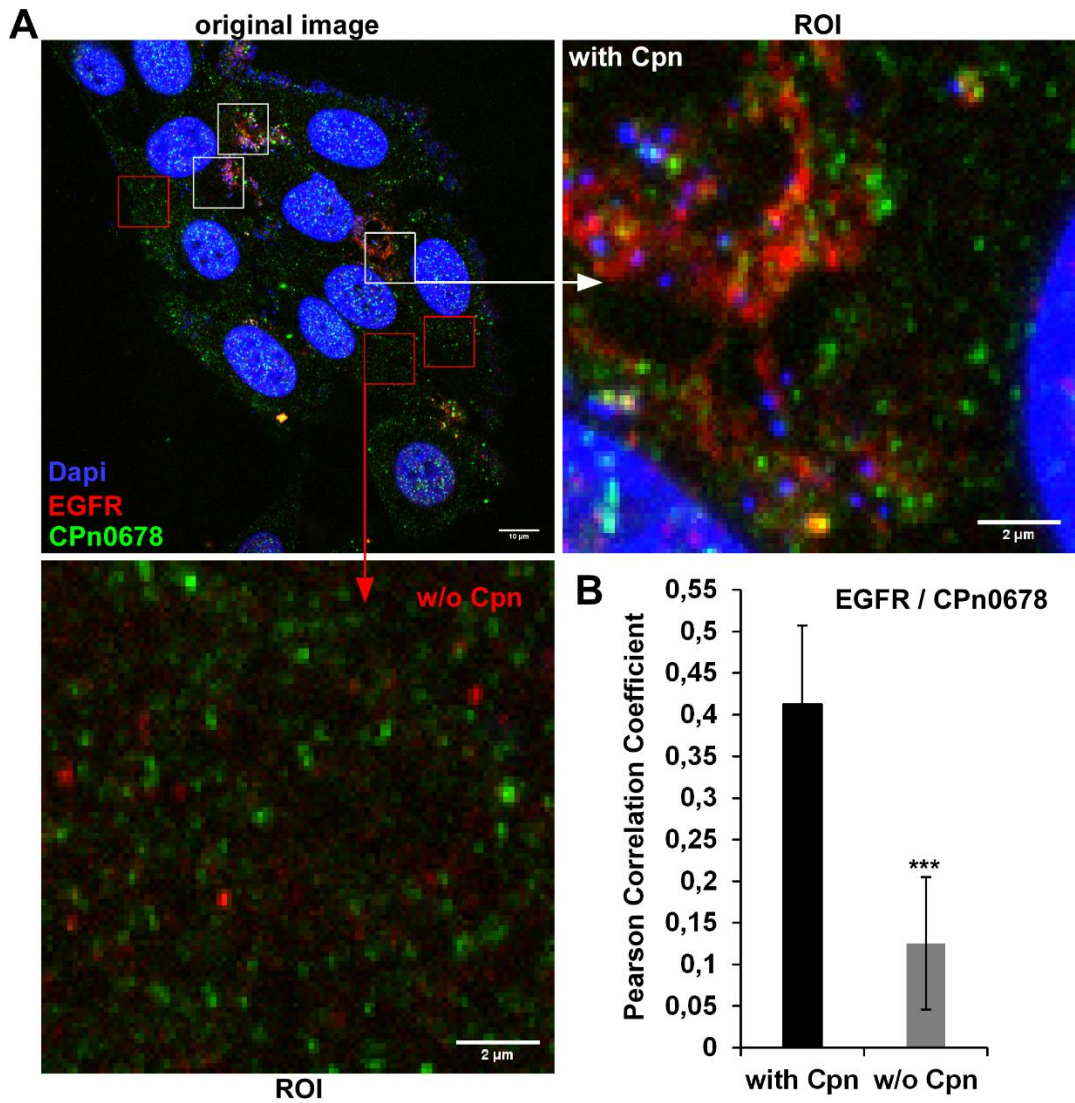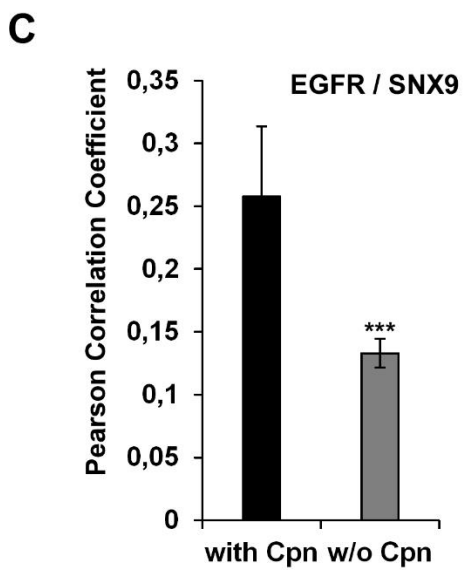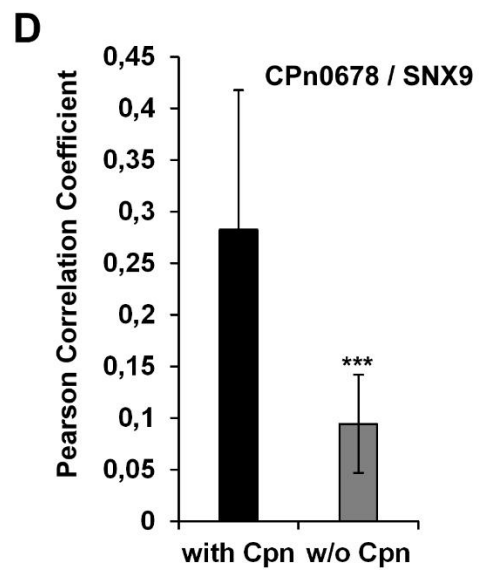

**Figure S3: Pearson Correlation Coefficient estimation for non-random colocalization.**

**(A-D)** Confocal images used for colocalization studies shown in Figs. 4A,B; 5A,B and 5D,E were subjected to the Fiji-plugin JaCoP for estimation of non-random colocalization. **(A)** ROIs of 100x100 pixel were chosen representing regions of strong chlamydial infection (with Cpn), which were compared to regions with cytoplasmic background signal (w/o Cpn). Bar 10  $\mu\text{m}$ , insets 2 $\mu\text{m}$ . **(B-D)** PCC values of corresponding signal pairs of EGFR & Cpn0678 **(B)**, EGFR & SNX9 **(C)** and CPn0678 & SNX9 **(D)** were estimated using JaCoP. Data are represented as mean  $\pm$  SD (n=3). *P* value: \*\*\*  $\leq 0.001$ .

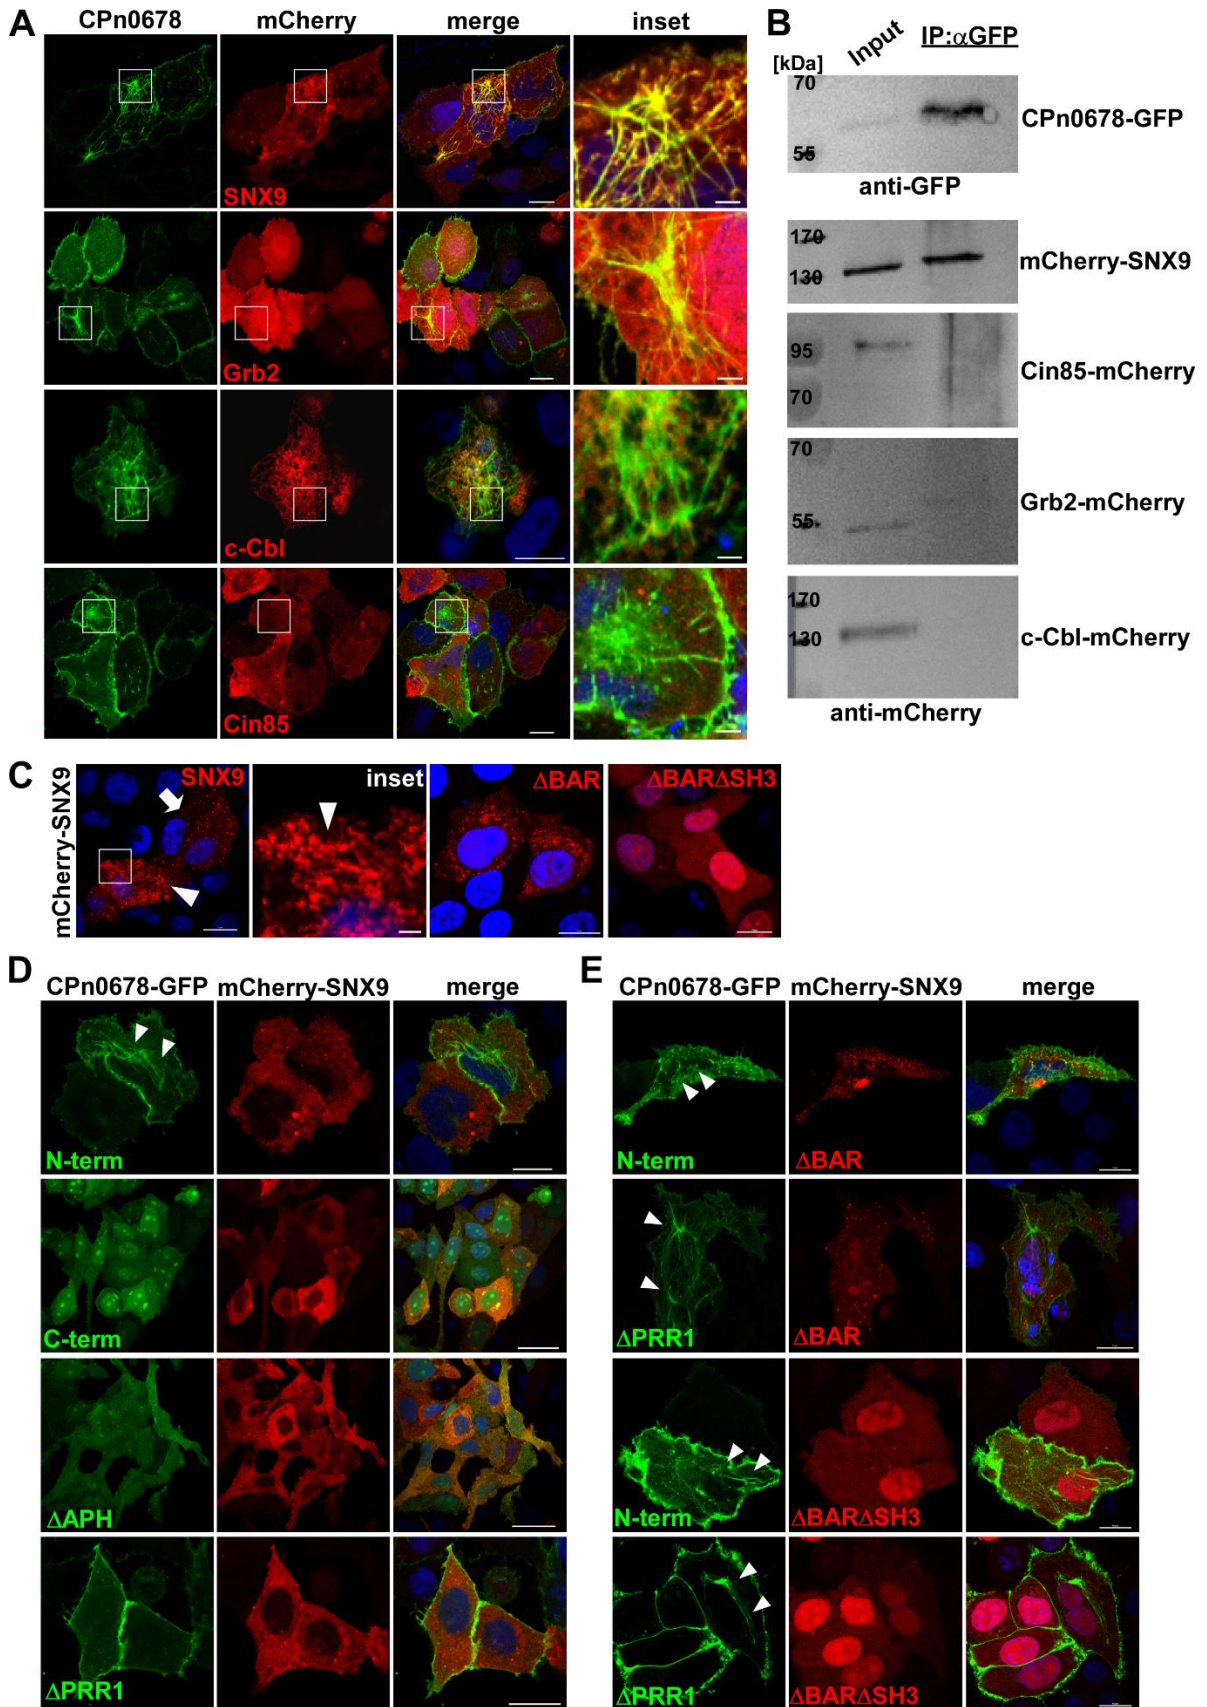

**Figure S4: CPn0678 interacts with SNX9 via the first PRR domain.**

**(A)** Confocal images of HEp-2 cells cotransfected with CPn0678-GFP and SNX9, Grb2, c-Cbl or Cin85, each fused to mCherry. Insets represent areas outlined in white boxes. Bar 10  $\mu\text{m}$ , insets 1  $\mu\text{m}$ . **(B)** Coimmunoprecipitation analysis of lysates of the HEp-2 cells shown in **(A)** using  $\mu\text{MACS}$  anti-GFP microbeads. Eluted samples were fractionated on SDS/PAGE and probed with antibodies against GFP and mCherry. **(C)** Confocal images of HEp-2 cells expressing mCherry-SNX9 or deletion variants ( $\Delta\text{BAR}$ ,  $\Delta\text{BAR}\Delta\text{SH3}$ ). Inset represents the area in the white box. The white arrow marks vesicular SNX9, the white arrowhead points to the tubulation phenotype. Bar 10  $\mu\text{m}$ , insets 1  $\mu\text{m}$ . **(D, E)** Confocal images of HEp-2 cells cotransfected with mCherry-SNX9 **(D)** or deletion variants **(E)** in combination with various CPn0678-GFP variants. White arrowheads mark CPn0678-GFP-positive membrane tubules. Bar 10  $\mu\text{m}$ .

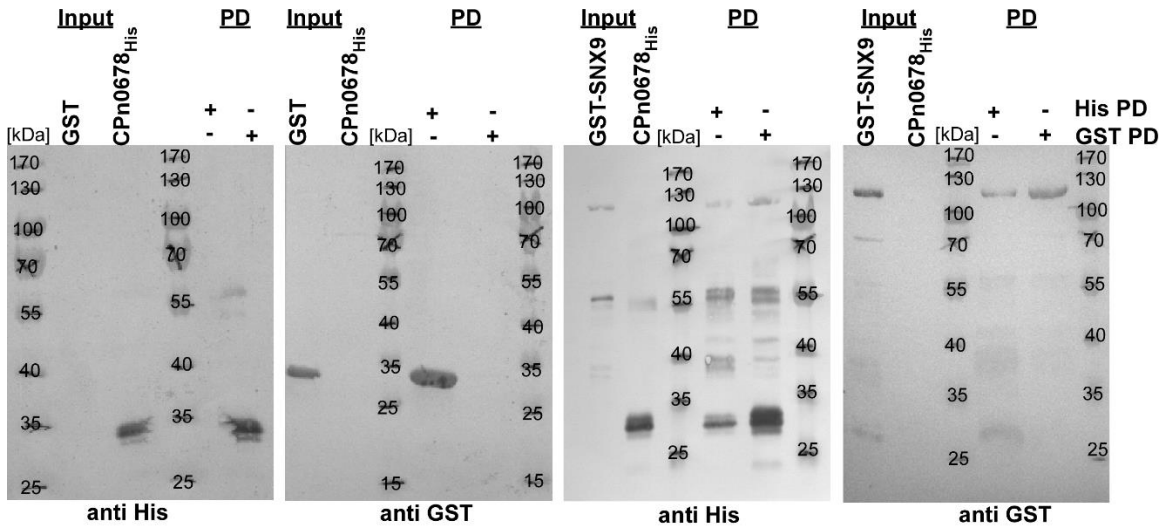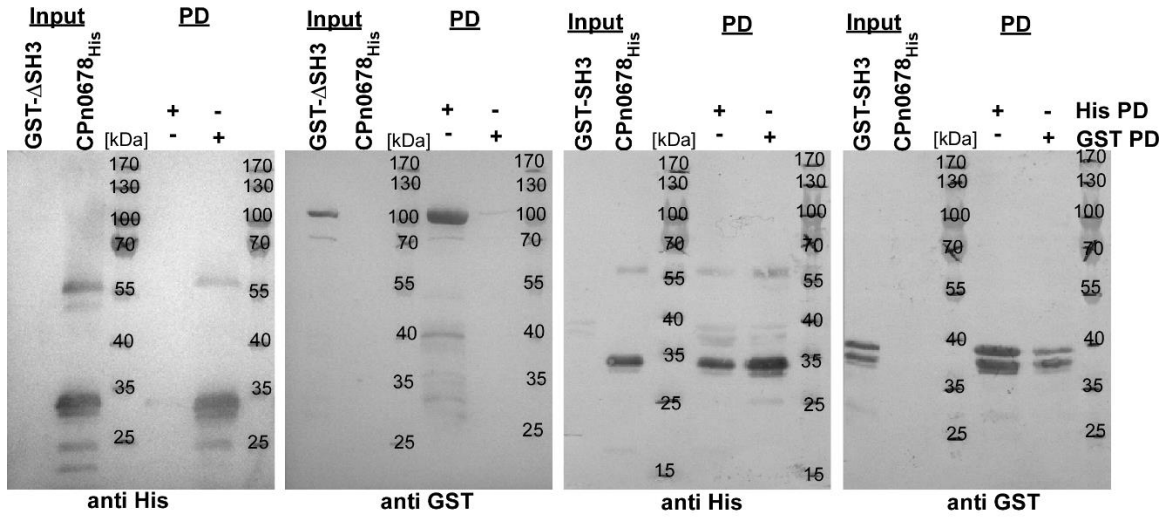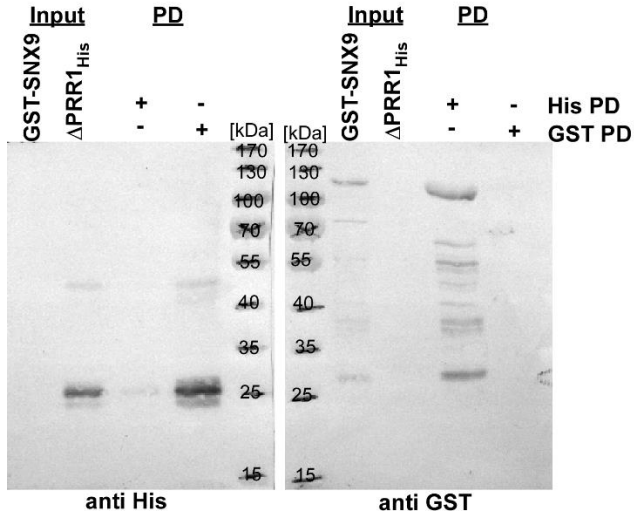

**Figure S5: GST-SNX9 interacts with CPn0678<sub>10His</sub> via the first PRR domain in pulldown experiments.**

Full immunoblots of pulldown experiments using purified recombinant GST or GST-SNX9 variants ( $\Delta$ SH3, SH3) and CPn0678<sub>10His</sub> or CPn0678 $\Delta$ PRR1<sub>10His</sub> shown in Fig.4C. Input and elution samples obtained from His-pulldowns and GST-pulldowns were fractionated by SDS/PAGE and probed with anti-GST and anti-His antibodies.



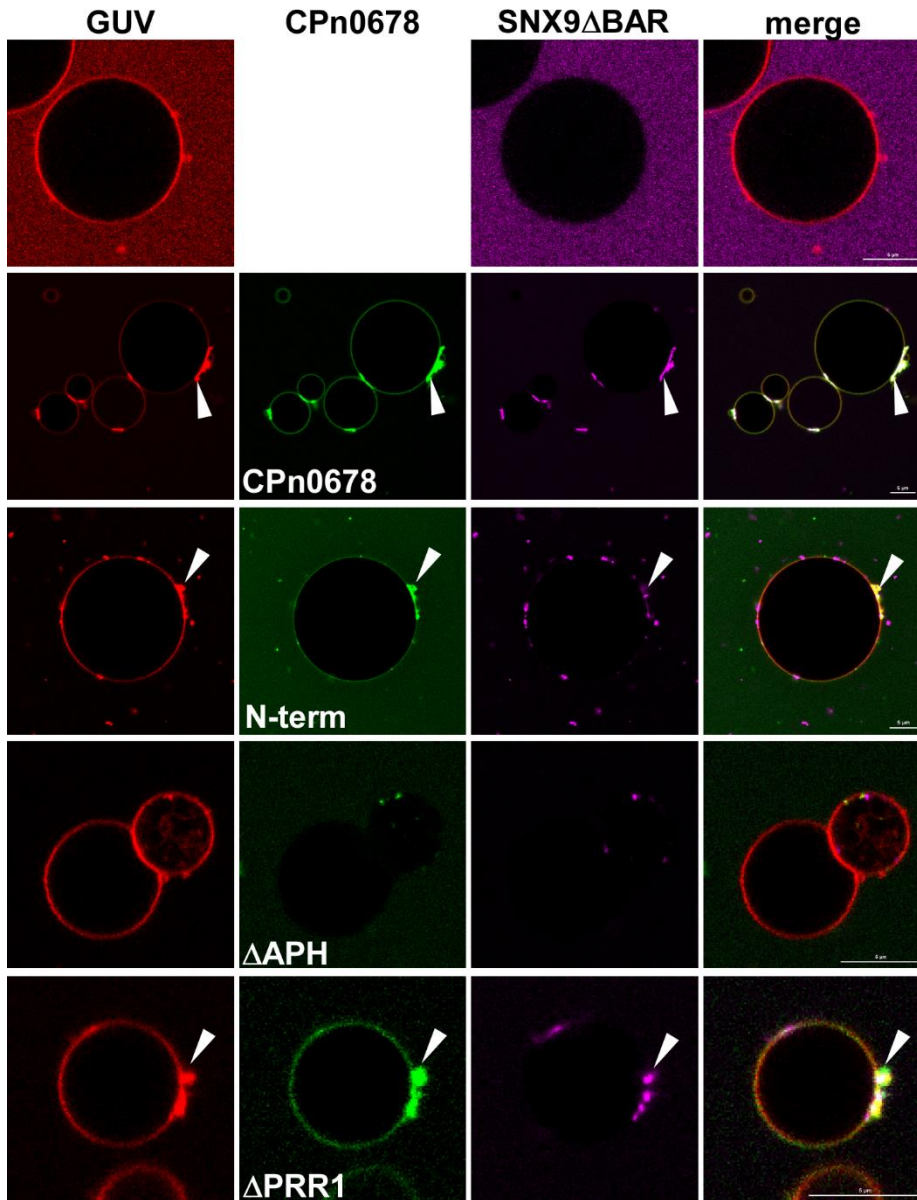

**Figure S6: CPn0678 tubulates artificial GUV membranes and recruits SNX9 independently of the BAR domain.**

Confocal images of GUVs containing PS and PIP<sub>4,5</sub> stained with Texas Red, incubated for 10 min with DyLight650-labeled SNX9 $\Delta$ BAR and then with FITC-labeled recombinant CPn0678 variants. White arrowheads mark recruitment of SNX9 $\Delta$ BAR to CPn0678-mediated membrane tubulations. Full movies in Supplementary Information (Movies S1-14). Bar 5  $\mu$ m.

| Gene    | Annotation | fold change 48h to 24h | fold change 72h to 24h |
|---------|------------|------------------------|------------------------|
| CPn0001 | CPn0001    | 5,636750823            | 5,9693084              |
| CPn0063 | CPn0063    | 6,234661239            | 14,71591787            |
| CPn0070 | CPn0070    | 5,963166207            | 8,876614032            |
| CPn0074 | tufA       | 4,80222784             | 4,519117701            |
| CPn0075 | secE       | 3,816863106            | 3,195971074            |
| CPn0081 | rpoB       | 4,616851004            | 6,364280215            |
| CPn0083 | tal        | 3,267103236            | 3,070514282            |
| CPn0104 | CPn0104    | 3,121271447            | 3,69889154             |
| CPn0105 | CPn0105    | 5,299547897            | 7,567230545            |
| CPn0117 | trmD       | 3,403976579            | 2,653074447            |
| CPn0121 | CPn0121    | 3,524192589            | 2,82073811             |
| CPn0134 | groEL_1    | 7,137862952            | 10,12196602            |
| CPn0135 | groES      | 4,458671547            | 8,504381872            |
| CPn0142 | CPn0142    | 3,085759832            | 3,256367156            |
| CPn0221 | CPn0221    | 3,769521106            | 2,432021189            |
| CPn0273 | tdk        | 3,58238979             | 2,805801535            |
| CPn0331 | CPn0331    | 3,08932564             | 7,066483163            |
| CPn0350 | CPn0350    | 3,997664608            | 4,746521382            |
| CPn0384 | hctB       | 6,243293038            | 23,35712839            |
| CPn0387 | CesT       | 3,209297737            | 3,424596904            |
| CPn0392 | dcd        | 3,017808845            | 2,885840882            |
| CPn0446 | pmp_8      | 3,613773987            | 3,680811914            |
| CPn0450 | pmp10      | 4,229176216            | 11,55393438            |
| CPn0453 | pmp_13     | 3,225334003            | 2,415916297            |
| CPn0498 | CPn0498    | 3,306810145            | 5,673387521            |
| CPn0502 | grpE       | 4,959182475            | 6,721933579            |
| CPn0503 | dnaK       | 9,638993899            | 6,866805375            |
| CPn0521 | glyA       | 4,160381583            | 3,8166806              |
| CPn0525 | CPn0525    | 3,351073037            | 2,775699902            |
| CPn0533 | NrdR       | 3,023427178            | 2,637249774            |
| CPn0557 | omcB       | 24,23364768            | 71,65717528            |
| CPn0558 | omcA       | 25,71720254            | 75,32399083            |
| CPn0560 | gltX       | 4,33112995             | 5,394737039            |
| CPn0564 | secD/secF  | 3,111667379            | 2,737708025            |
| CPn0572 | Tarp       | 3,216960244            | 5,66072443             |
| CPn0604 | fliY       | 5,264478678            | 3,957157533            |
| CPn0610 | rho        | 4,268642364            | 2,276450897            |
| CPn0623 | CPn0623    | 5,803184015            | 2,577977638            |
| CPn0624 | gapA       | 4,20749384             | 2,722804801            |
| CPn0637 | rl14       | 4,371686142            | 7,695898741            |



|         |         |             |             |
|---------|---------|-------------|-------------|
| CPn0638 | rs17    | 3,293526802 | 2,614938829 |
| CPn0639 | rl29    | 3,053997208 | 2,032349506 |
| CPn0641 | rs3     | 4,105711779 | 3,373365178 |
| CPn0642 | rl22    | 3,318607439 | 2,659027068 |
| CPn0644 | rl2     | 3,824933838 | 2,270614442 |
| CPn0646 | rl4     | 3,975266781 | 2,663691329 |
| CPn0647 | rl3     | 3,209502269 | 2,056019633 |
| CPn0650 | lpxA    | 5,373997691 | 3,631535883 |
| CPn0656 | CPn0656 | 3,530970339 | 3,523790031 |
| CPn0661 | mip     | 2,967889366 | 3,017835292 |
| CPn0677 | CPn0677 | 4,428453467 | 8,292621175 |
| CPn0678 | CPn0678 | 3,932756299 | 8,753746766 |
| CPn0684 | parB    | 3,992034508 | 6,650759783 |
| CPn0693 | CPn0693 | 6,925530235 | 10,24016188 |
| CPn0695 | ompA    | 7,913186864 | 10,11095233 |
| CPn0699 | rrf     | 4,604749085 | 3,848708393 |
| CPn0704 | fliN    | 3,820195584 | 6,297715929 |
| CPn0705 | CPn0705 | 5,703365947 | 6,930167613 |
| CPn0707 | yscN    | 3,275211221 | 4,588337382 |
| CPn0708 | CPn0708 | 6,297047366 | 11,0428756  |
| CPn0709 | CPn0709 | 6,163549626 | 9,132716774 |
| CPn0710 | CPn0710 | 5,324950954 | 5,794437208 |
| CPn0711 | CPn0711 | 3,625958098 | 3,835542043 |
| CPn0718 | CPn0718 | 3,17039914  | 3,299864175 |
| CPn0725 | CPn0725 | 3,210708213 | 3,395663651 |
| CPn0726 | CPn0726 | 4,626968354 | 12,30647872 |
| CPn0733 | rs4     | 3,839536253 | 4,448298678 |
| CPn0748 | ispA    | 3,164654888 | 2,80526245  |
| CPn0754 | rs20    | 3,542849838 | 4,168256764 |
| CPn0756 | rpoD    | 6,399320818 | 7,155749341 |
| CPn0809 | CopB    | 5,005876779 | 12,24520674 |
| CPn0810 | CPn0810 | 5,855721004 | 8,739304991 |
| CPn0854 | porB    | 6,365874268 | 6,914044482 |
| CPn0877 | ybcL    | 5,099918455 | 6,025136319 |
| CPn0884 | YajC    | 4,268163969 | 3,499484265 |
| CPn0909 | rsbV_2  | 5,230623806 | 6,439035859 |
| CPn0951 | rs6     | 5,013305187 | 3,143890631 |
| CPn0963 | pmp_21  | 4,450203889 | 4,994199482 |
| CPn0979 | htrA    | 3,041502413 | 2,031007588 |
| CPn0984 | nrdA    | 3,145236674 | 3,42077434  |
| CPn0985 | nrdB    | 4,201575217 | 4,748826062 |

|                 |      |             |             |
|-----------------|------|-------------|-------------|
| CPn0997         | mesJ | 6,07740541  | 6,282719074 |
| CPn0998         | ftsH | 3,26511914  | 4,116033268 |
| CPn0999         | pnp  | 6,689058981 | 5,278182514 |
| CPn1025         | pgi  | 3,342370146 | 4,428105883 |
| CPn1028         | mdhC | 3,589979954 | 3,038683291 |
| CPn1031         | arcD | 5,355892407 | 6,353506298 |
| CPn1032         | AaxB | 5,928502191 | 8,630076346 |
| C. pn. specific |      | > 3-fold    |             |

**Table S1: Transcriptional analysis of *C. pneumoniae* genes upregulated late in infection.**

Gene names and Uniprot annotations ([www.uniprot.org](http://www.uniprot.org)) are listed for 88 *C. pneumoniae* genes that are upregulated late in infection ( $\geq 3$ -fold) as indicated by comparative microarray studies. The Table shows the calculated fold-change for comparisons of 48 hpi to 24 hpi and 72 hpi to 24 hpi.

**Movie S1 (separate file). Untreated (control) GUVs.**

GUVs containing PS and PIP4,5 were stained with Texas Red, and imaged for 10 min.

**Movie S2 (separate file). GUVs with CPn0678.**

2 µg CPn0678 labeled with FITC was added to GUVs containing PS and PIP4,5 stained with Texas Red and imaged for 5 min in PBS.

**Movie S3 (separate file). GUVs with CPn0678 N-term.**

A 2-µg aliquot of CPn0678 N-term labeled with FITC was added to GUVs containing PS and PIP4,5 stained with Texas Red and imaged for 5 min in PBS.

**Movie S4 (separate file). GUVs with CPn0678 ΔAPH.**

A 2-µg aliquot of CPn0678 ΔAPH labeled with FITC was added to GUVs containing PS and PIP4,5 stained with Texas Red and imaged for 5 min in PBS.

**Movie S5 (separate file). GUVs with CPn0678 ΔPRR1.**

A 2-µg aliquot of CPn0678 ΔPRR1 labeled with FITC was added to GUVs containing PS and PIP4,5 stained with Texas Red and imaged for 5 min in PBS.

**Movie S6 (separate file). GUVs with SNX9.**

A 2-µg aliquot of SNX9 labeled with DyLight was added to GUVs containing PS and PIP4,5 stained with Texas Red and imaged for 10 min.

**Movie S7 (separate file). GUVs with SNX9 and CPn0678.**

A 2-µg aliquot of SNX9 labeled with DyLight was added to GUVs containing PS and PIP4,5 stained with Texas Red and incubated for 10 min prior to addition of 2 µg CPn0678 labeled with FITC. GUVs were imaged for 5 min.

**Movie S8 (separate file). GUVs with SNX9 and CPn0678 N-term.**

A 2-µg aliquot of SNX9 labeled with DyLight was added to GUVs containing PS and PIP4,5 stained with Texas Red and incubated for 10 min prior to addition of 2 µg CPn0678 N-term labeled with FITC. GUVs were imaged for 5 min.

**Movie S9 (separate file). GUVs with SNX9 and CPn0678  $\Delta$ APH.**

A 2- $\mu$ g aliquot of SNX9 labeled with DyLight was added to GUVs containing PS and PIP4,5 stained with Texas Red and incubated for 10 min prior to addition of 2  $\mu$ g CPn0678  $\Delta$ APH labeled with FITC. GUVs were imaged for 5 min.

**Movie S10 (separate file). GUVs with SNX9 and CPn0678  $\Delta$ PRR1.**

A 2- $\mu$ g aliquot of SNX9 labeled with DyLight was added to GUVs containing PS and PIP4,5 stained with Texas Red and incubated for 10 min prior to addition of 2  $\mu$ g CPn0678  $\Delta$ PRR1 labeled with FITC. GUVs were imaged for 5 min.

**Movie S11 (separate file). GUVs with SNX9 $\Delta$ BAR.**

A 2- $\mu$ g aliquot of SNX9 $\Delta$ BAR labeled with DyLight was added to GUVs containing PS and PIP4,5 stained with Texas Red and imaged for 10 min.

**Movie S12 (separate file). GUVs with SNX9 $\Delta$ BAR and CPn0678.**

A 2- $\mu$ g aliquot of SNX9 $\Delta$ BAR labeled with DyLight was added to GUVs containing PS and PIP4,5 stained with Texas Red and incubated for 10 min prior to addition of 2  $\mu$ g CPn0678 labeled with FITC. GUVs were imaged for 5 min.

**Movie S13 (separate file). GUVs with SNX9 $\Delta$ BAR and CPn0678 N-term.**

A 2- $\mu$ g aliquot of SNX9 $\Delta$ BAR labeled with DyLight was added to GUVs containing PS and PIP4,5 stained with Texas Red and incubated for 10 min prior to addition of 2  $\mu$ g CPn0678 N-term labeled with FITC. GUVs were imaged for 5 min.

**Movie S14 (separate file). GUVs with SNX9 $\Delta$ BAR and CPn0678  $\Delta$ APH.**

A 2- $\mu$ g aliquot of SNX9 $\Delta$ BAR labeled with DyLight was added to GUVs containing PS and PIP4,5 stained with Texas Red and incubated for 10 min prior to addition of 2  $\mu$ g CPn0678  $\Delta$ APH labeled with FITC. GUVs were imaged for 5 min.

**Movie S15 (separate file). GUVs with SNX9 $\Delta$ BAR and CPn0678  $\Delta$ PRR1.**

A 2- $\mu$ g aliquot of SNX9 $\Delta$ BAR labeled with DyLight was added to GUVs containing PS and PIP4,5 stained with Texas Red and incubated for 10 min prior to addition of 2  $\mu$ g CPn0678  $\Delta$ PRR1 labeled with FITC. GUVs were imaged for 5 min
